# Supplementary material for: Design of high-performance antimony/MXene hybrid electrodes for sodium-ion batteries
Source: Royal Society of Chemistry journal article supplement (doi:10.1039/d2ta00542e), 2022-01-01
Supplement: d2ta00542e1.pdf [file d2ta00542e1.pdf]

## Supporting Information

# **Design of High-Performance Antimony / MXene Hybrid Electrodes for Sodium-Ion Batteries**

**Stefanie Arnold,<sup>1,2</sup> Antonio Gentile,<sup>3,4</sup> Yunjie Li,<sup>1,2</sup> Qingsong Wang,<sup>1,5</sup>**

**Stefano Marchionna,<sup>4</sup> Riccardo Ruffo,<sup>3,6\*</sup> and Volker Presser<sup>1,2,7\*</sup>**

<sup>1</sup> INM - Leibniz Institute for New Materials, Campus D2.2, 66123 Saarbrücken, Germany

<sup>2</sup> Department of Materials Science and Engineering, Saarland University, Campus D2.266123 Saarbrücken, Germany

<sup>3</sup> Dipartimento di Scienza dei Materiali, Università degli Studi di Milano Bicocca, Via Cozzi 55, 20125 Milano, Italy

<sup>4</sup> Ricerca sul Sistema Energetico- RSE S.p.A., Via R. Rubattino 54, 20134 Milano, Italy

<sup>5</sup> Institute of Nanotechnology, Karlsruhe Institute of Technology, Hermann-von-Helmholtz-Platz 1, 76344, Eggenstein-Leopoldshafen, Germany

<sup>6</sup> National Reference Center for Electrochemical Energy Storage (GISEL) - Consorzio Interuniversitario Nazionale per la Scienza e Tecnologia dei Materiali (INSTM), 50121 Firenze, Italy

<sup>7</sup> Saarene - Saarland Center for Energy Materials and Sustainability, Campus D4.2, 66123 Saarbrücken, Germany

\* Corresponding author's E-Mail: VP: [volker.presser@leibniz-inm.de](mailto:volker.presser@leibniz-inm.de); RR: [riccardo.ruffo@unimib.it](mailto:riccardo.ruffo@unimib.it)

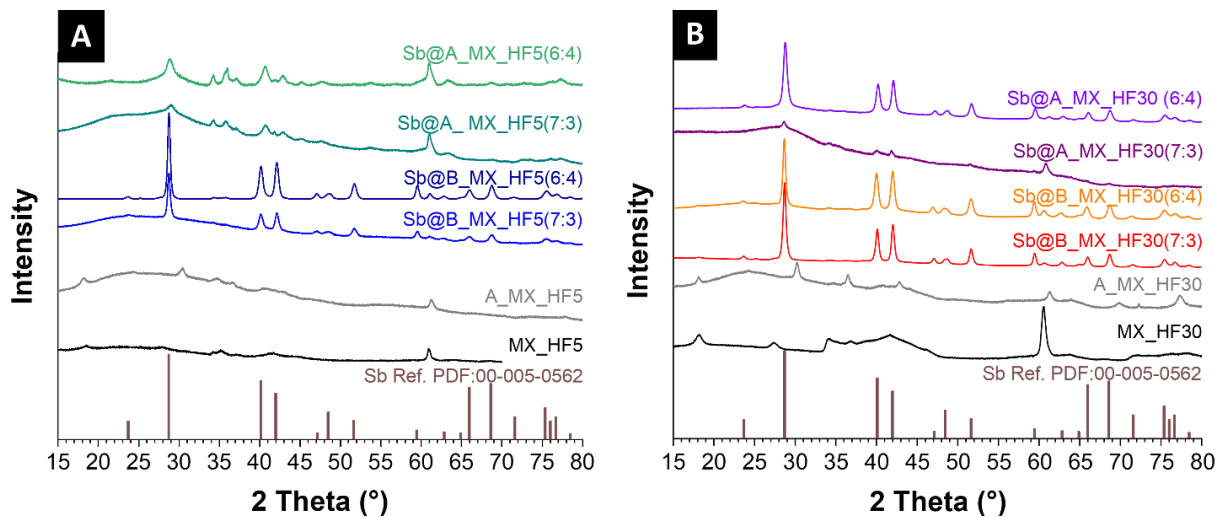

**Figure S1:** X-ray diffraction patterns of different Sb@Ti<sub>3</sub>C<sub>2</sub>T<sub>x</sub> hybrid materials (+pure Ti<sub>3</sub>C<sub>2</sub>T<sub>x</sub> and expanded Ti<sub>3</sub>C<sub>2</sub>T<sub>x</sub>) by using the MXene etched with 5 mass% HF (A) and 30 mass% HF (B).

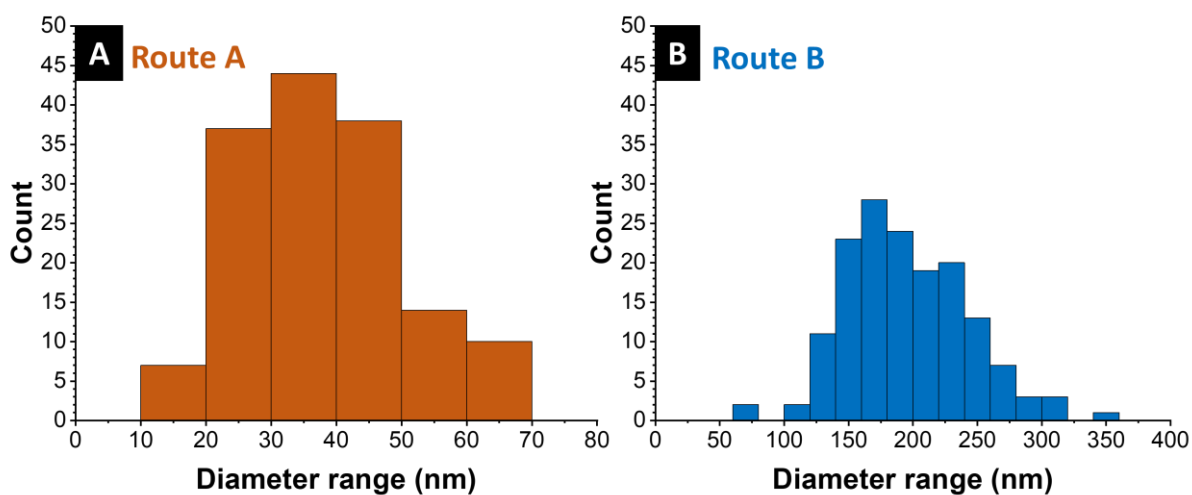

**Figure S2:** Particle size distribution derived from image analysis of scanning electron micrographs of 150 antimony particles synthesized via synthesis Route A (A) and via synthesis Route B (B).

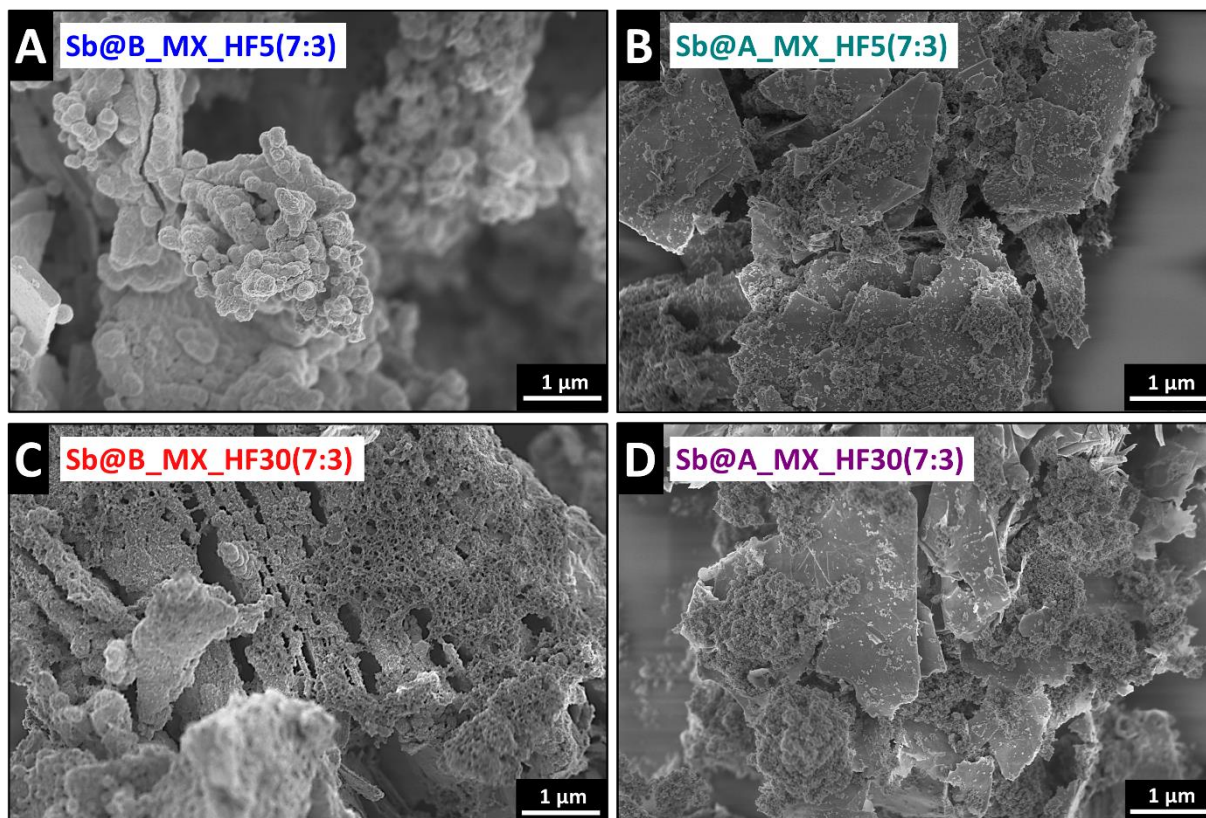

**Figure S3:** Scanning electron micrographs of (A) antimony  $\text{Ti}_3\text{C}_2\text{T}_z$  (5 mass% HF) hybrid with a composition of 7:3 (B) antimony expanded  $\text{Ti}_3\text{C}_2\text{T}_z$  (5 mass% HF) hybrid with a composition of 7:3 (C) antimony  $\text{Ti}_3\text{C}_2\text{T}_z$  (30 mass% HF) hybrid with a composition of 7:3 (D) antimony expanded  $\text{Ti}_3\text{C}_2\text{T}_z$  (30 mass% HF) hybrid with a composition of 7:3.

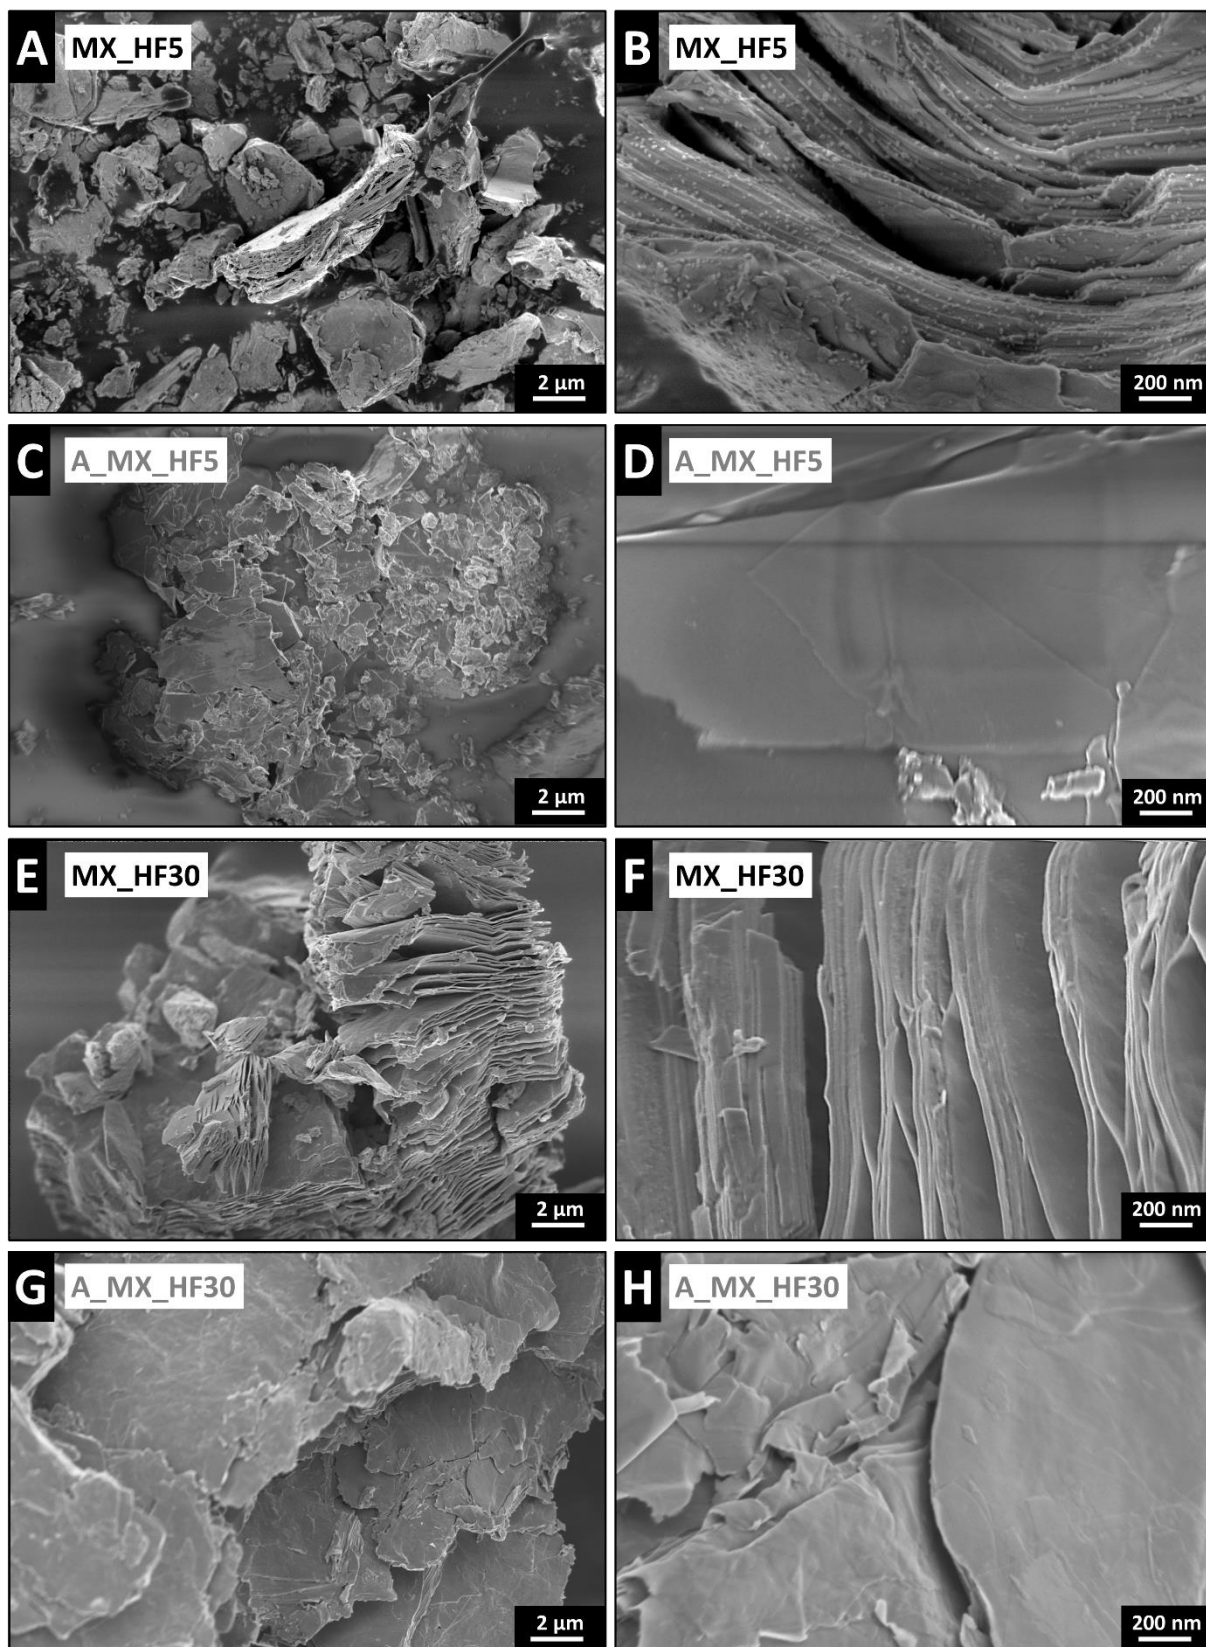

**Figure S4:** Material characterization of the different MXenes. Scanning electron micrographs of (A-B)  $\text{Ti}_3\text{C}_2\text{T}_z$  (5 mass% HF), (C-D) with TMAOH expanded  $\text{Ti}_3\text{C}_2\text{T}_z$  (5 mass% HF), (E-F)  $\text{Ti}_3\text{C}_2\text{T}_z$  (30 mass% HF), (G-H) with TMAOH expanded  $\text{Ti}_3\text{C}_2\text{T}_z$  (30 mass% HF).



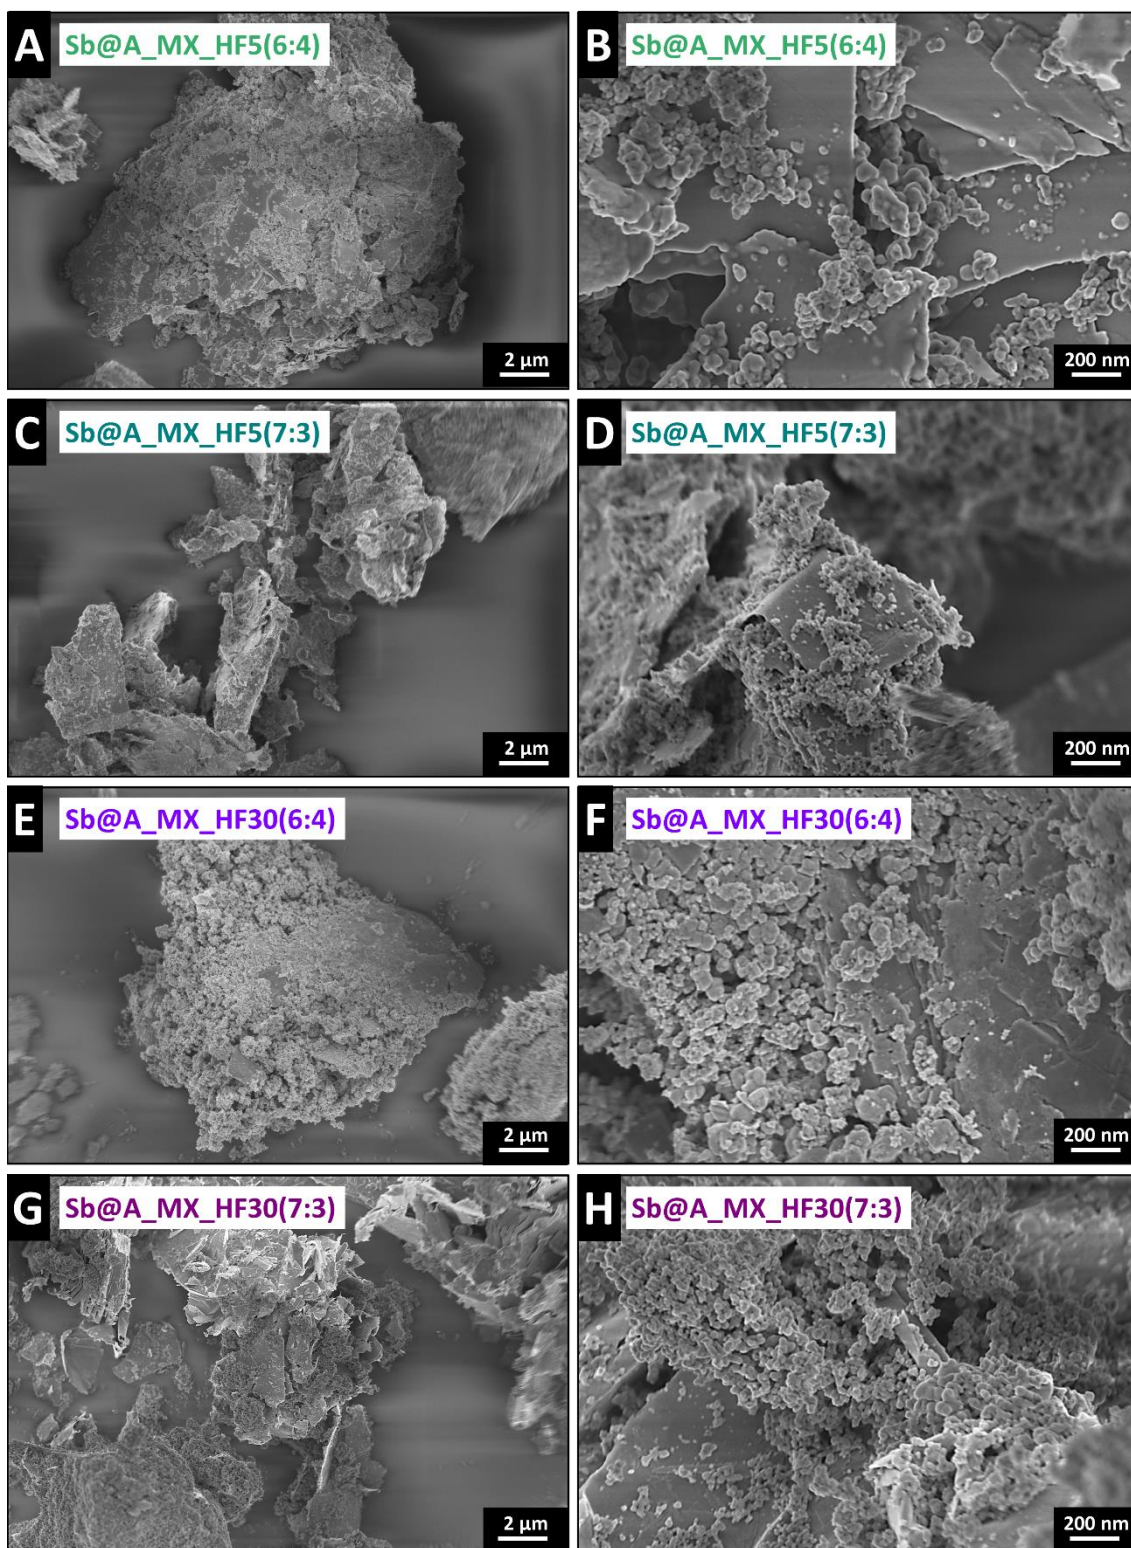

**Figure S5:** Material characterization of the different with TMAOH expanded MXene antimony hybrids. Scanning electron micrographs of (A-B) antimony expanded  $\text{Ti}_3\text{C}_2\text{T}_z$  (5 mass% HF) hybrid with a composition of 6:4, (C-D) antimony expanded  $\text{Ti}_3\text{C}_2\text{T}_z$  (5 mass% HF) hybrid with a composition of 7:3, (E-F) antimony expanded  $\text{Ti}_3\text{C}_2\text{T}_z$  (30 mass% HF) hybrid with a composition of 6:4, (G-H) antimony expanded  $\text{Ti}_3\text{C}_2\text{T}_z$  (30 mass% HF) hybrid with a composition of 7:3.

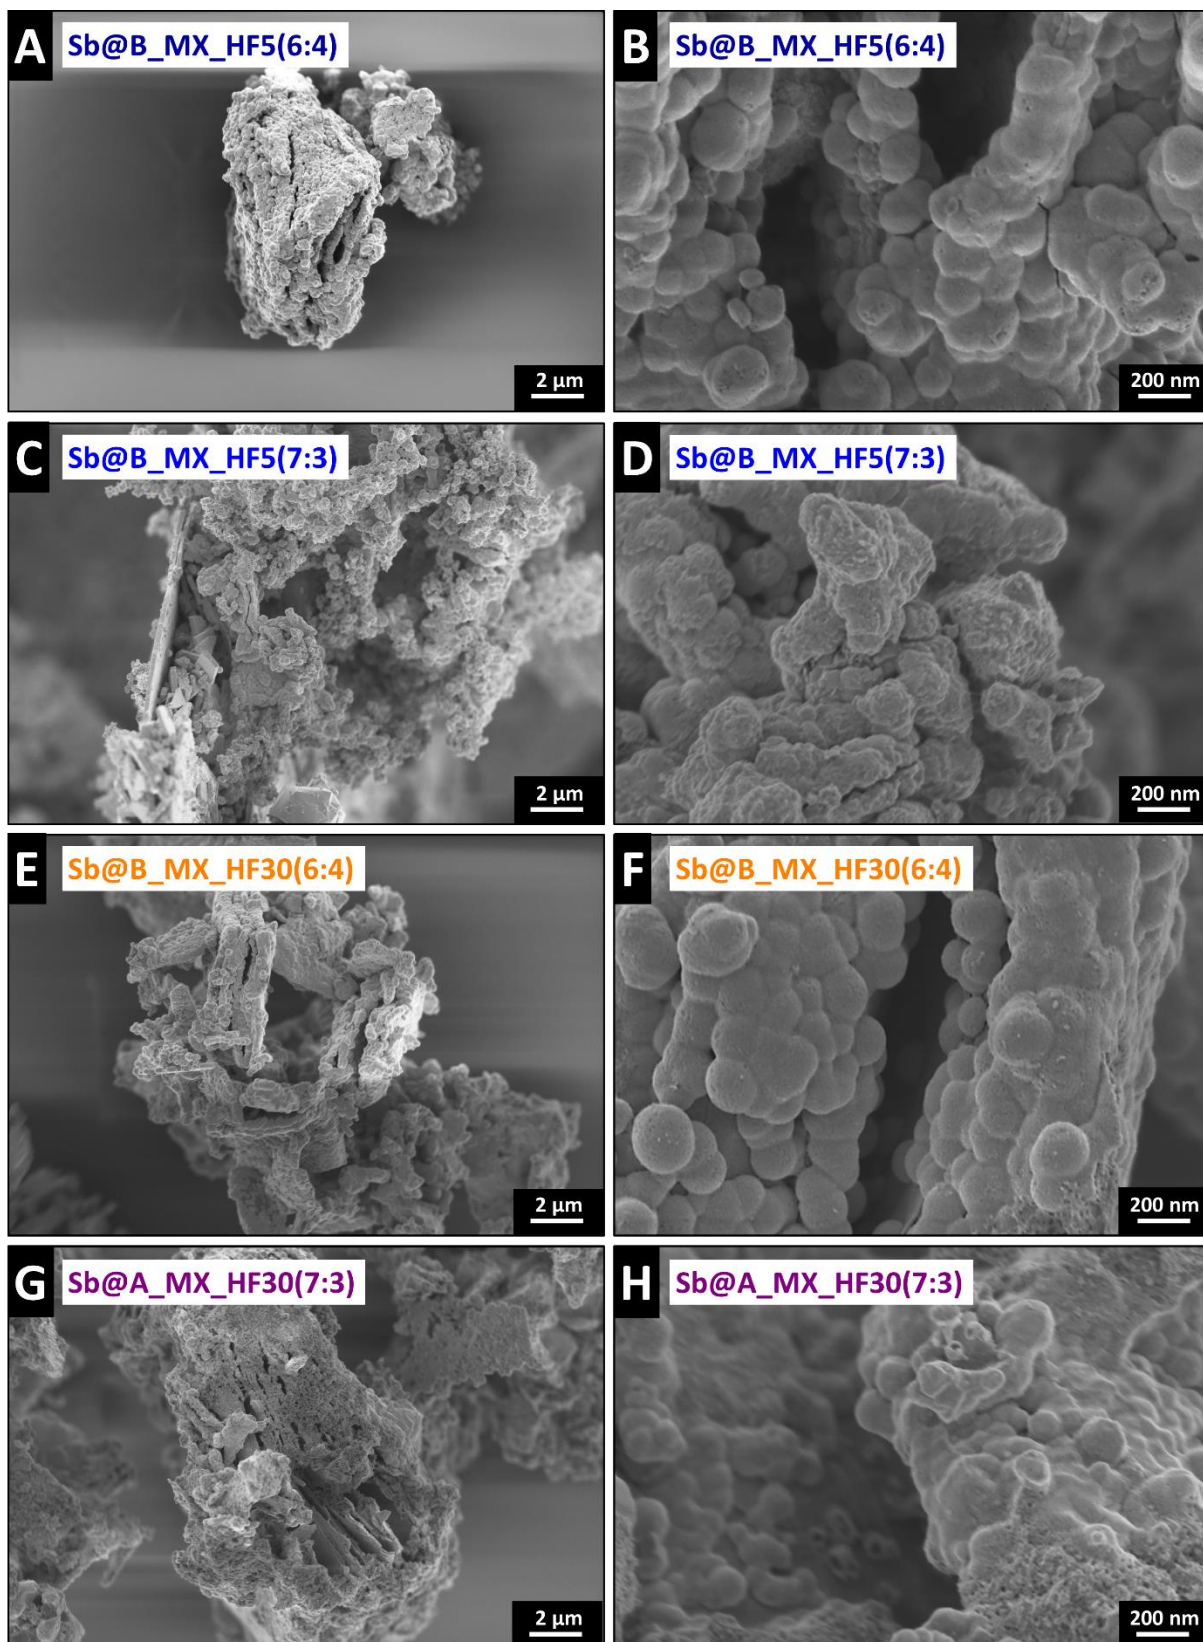

**Figure S6:** Material characterization of the different MXenes hybrids. Scanning electron micrographs of (A-B) antimony  $\text{Ti}_3\text{C}_2\text{T}_z$  (5% mass% HF) hybrid with a composition of 6:4, (C-D) antimony  $\text{Ti}_3\text{C}_2\text{T}_z$  (5% mass% HF) hybrid with a composition of 7:3, (E-F) antimony  $\text{Ti}_3\text{C}_2\text{T}_z$  (30% mass% HF) hybrid with a composition of 6:4, (G-H) antimony  $\text{Ti}_3\text{C}_2\text{T}_z$  (30% mass% HF) hybrid with a composition of 7:3.



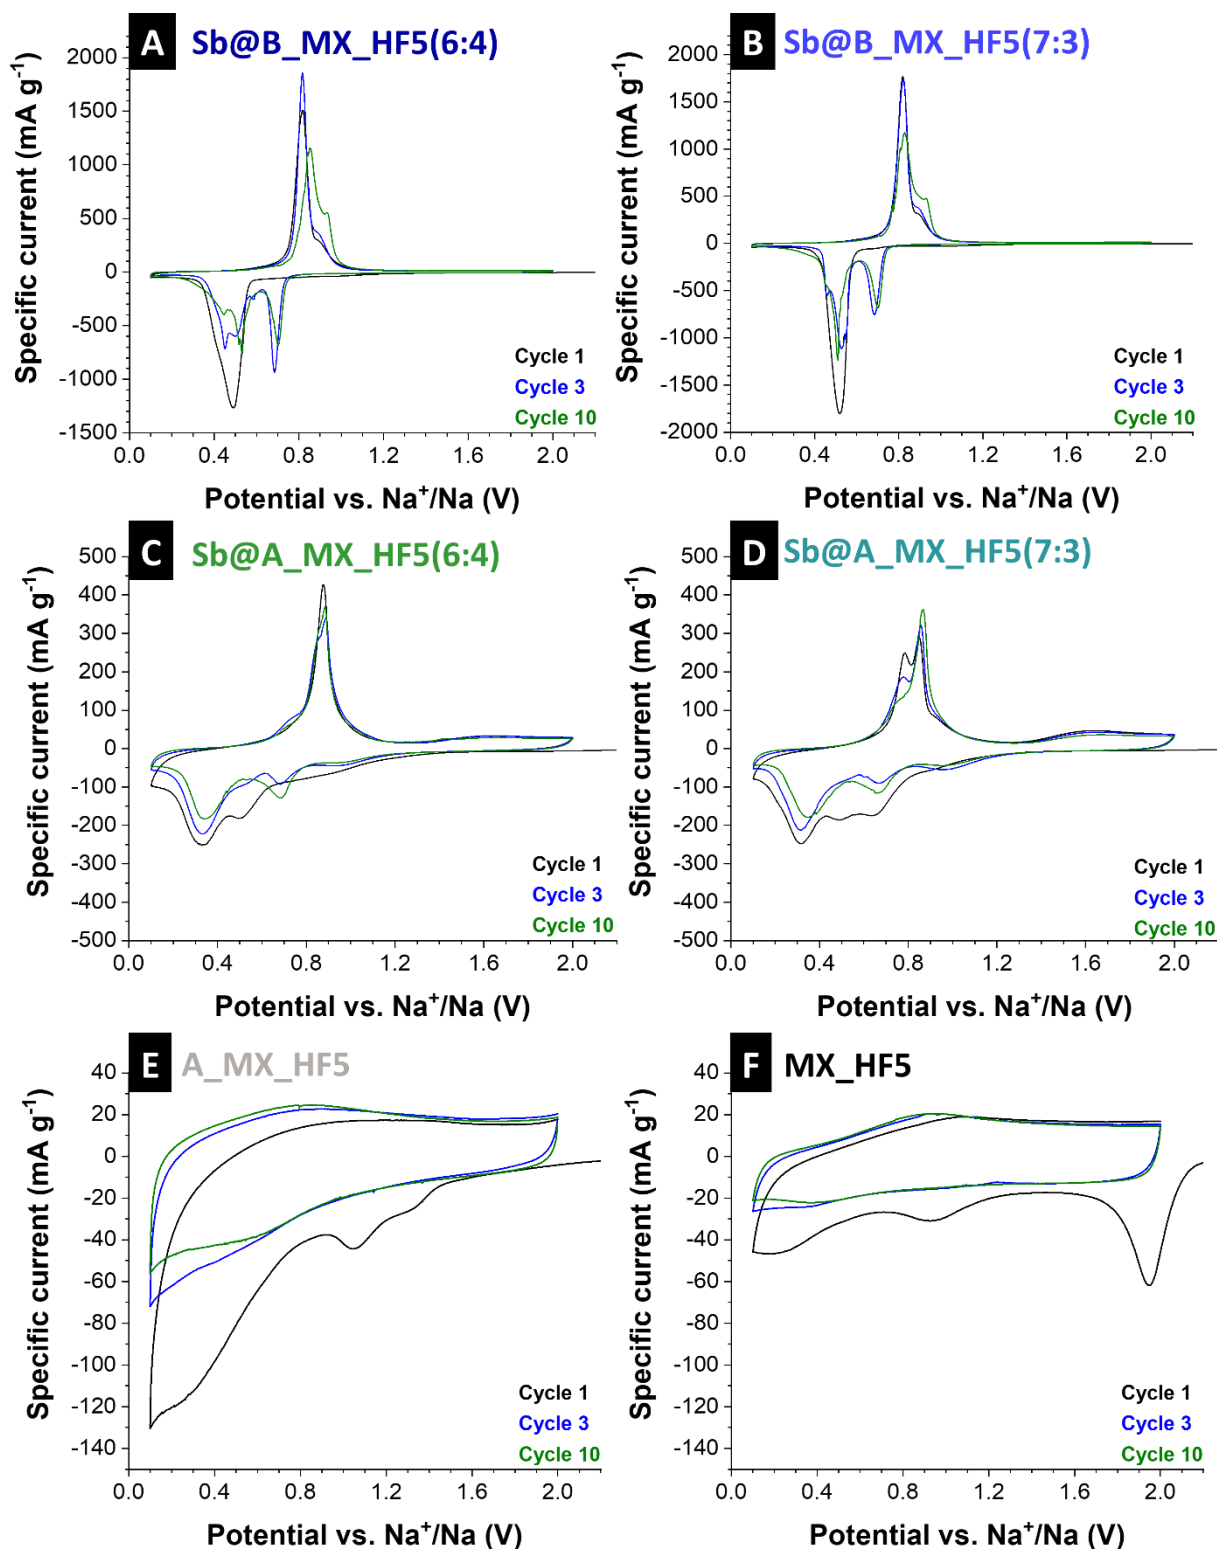

**Figure S7:** Cyclic voltammograms recorded at  $0.1 \text{ mV s}^{-1}$  in the potential range of 0.1-2.0 V vs.  $\text{Na}^+/\text{Na}$  for (A) antimony  $\text{Ti}_3\text{C}_2\text{T}_z$  (5% mass% HF) hybrid with a composition of 6:4, (B) antimony  $\text{Ti}_3\text{C}_2\text{T}_z$  (5% mass% HF) hybrid with a composition of 7:3, (C) antimony expanded  $\text{Ti}_3\text{C}_2\text{T}_z$  (5% HF) hybrid with a composition of 6:4, (D) antimony expanded  $\text{Ti}_3\text{C}_2\text{T}_z$  (5% mass% HF) hybrid with a composition of 7:3, (E) v  $\text{Ti}_3\text{C}_2\text{T}_z$  (5% mass% HF), (F) not expanded  $\text{Ti}_3\text{C}_2\text{T}_z$  (5% mass% HF).

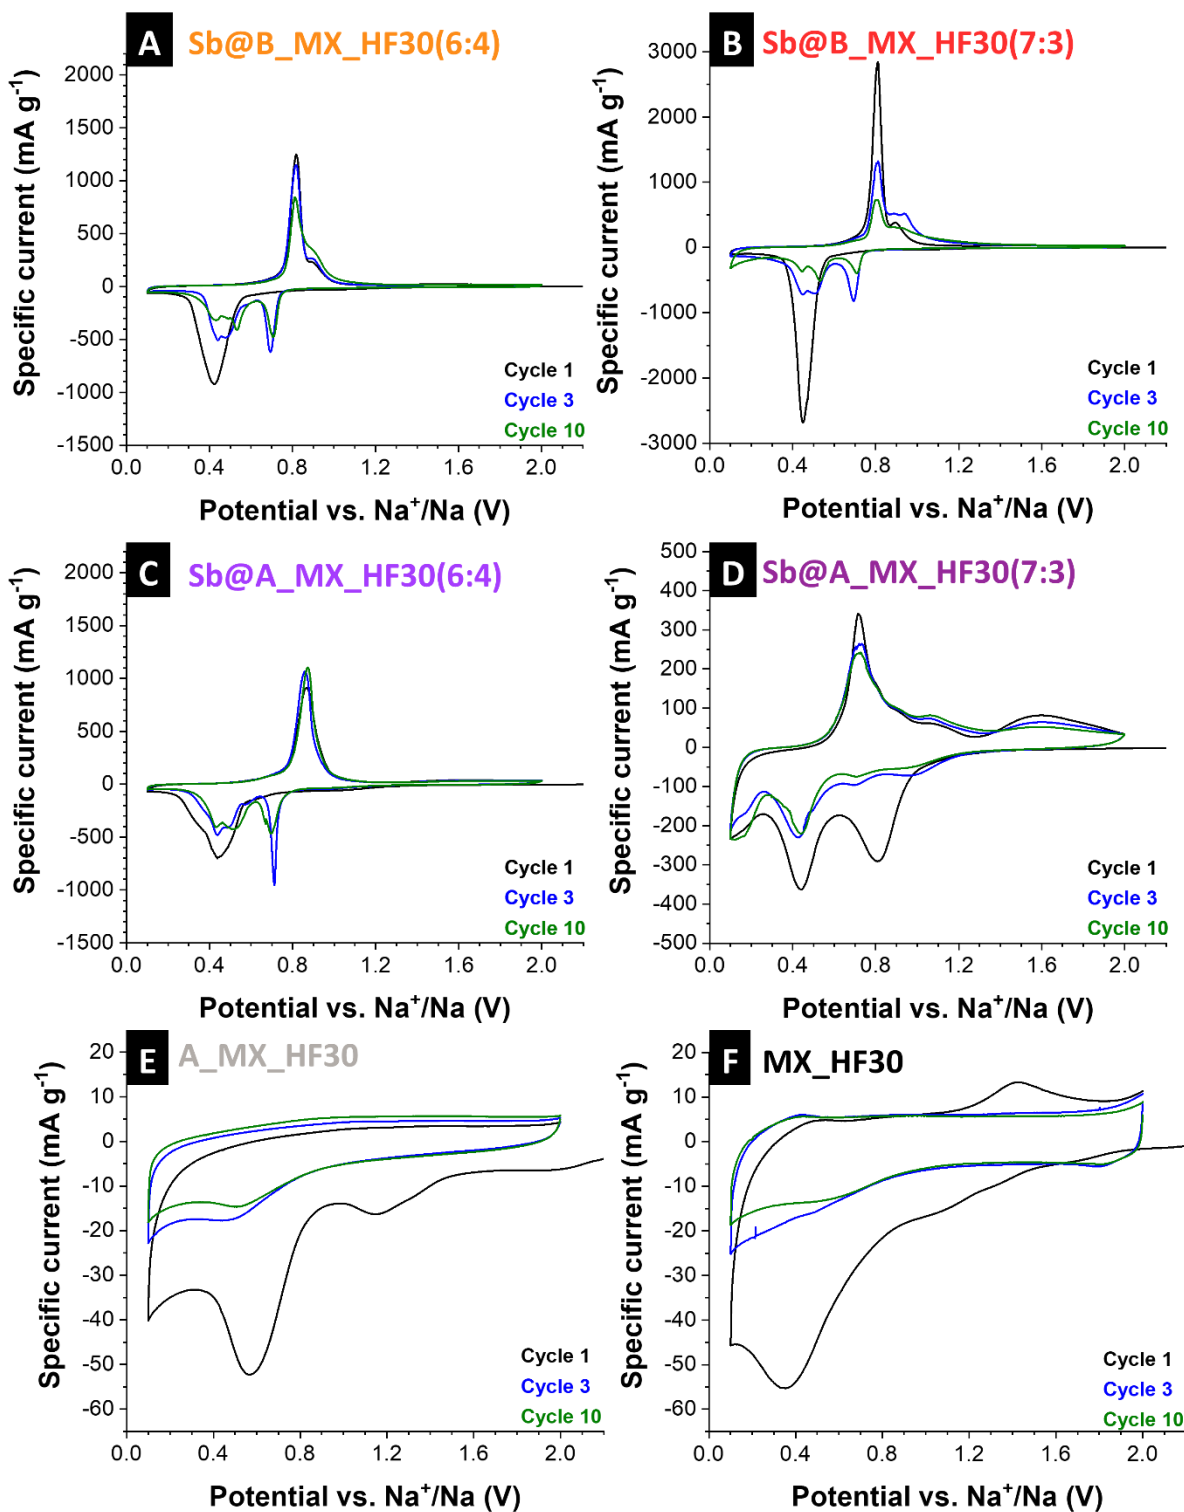

**Figure S8:** Cyclic voltammograms recorded at 0.1 mV s<sup>-1</sup> in the potential range of 0.1-2.0 V vs. Na<sup>+</sup>/Na for (A) antimony Ti<sub>3</sub>C<sub>2</sub>T<sub>z</sub> (30% mass% HF) hybrid with a composition of 6:4, (B) antimony Ti<sub>3</sub>C<sub>2</sub>T<sub>z</sub> (30% mass% HF) hybrid with a composition of 7:3, (C) antimony expanded Ti<sub>3</sub>C<sub>2</sub>T<sub>z</sub> (30% mass% HF) hybrid with a composition of 6:4, (D) antimony expanded Ti<sub>3</sub>C<sub>2</sub>T<sub>z</sub> (30% mass% HF) hybrid with a composition of 7:3, (E) expanded Ti<sub>3</sub>C<sub>2</sub>T<sub>z</sub> (30% mass% HF), (F) not expanded Ti<sub>3</sub>C<sub>2</sub>T<sub>z</sub> (30% mass% HF).



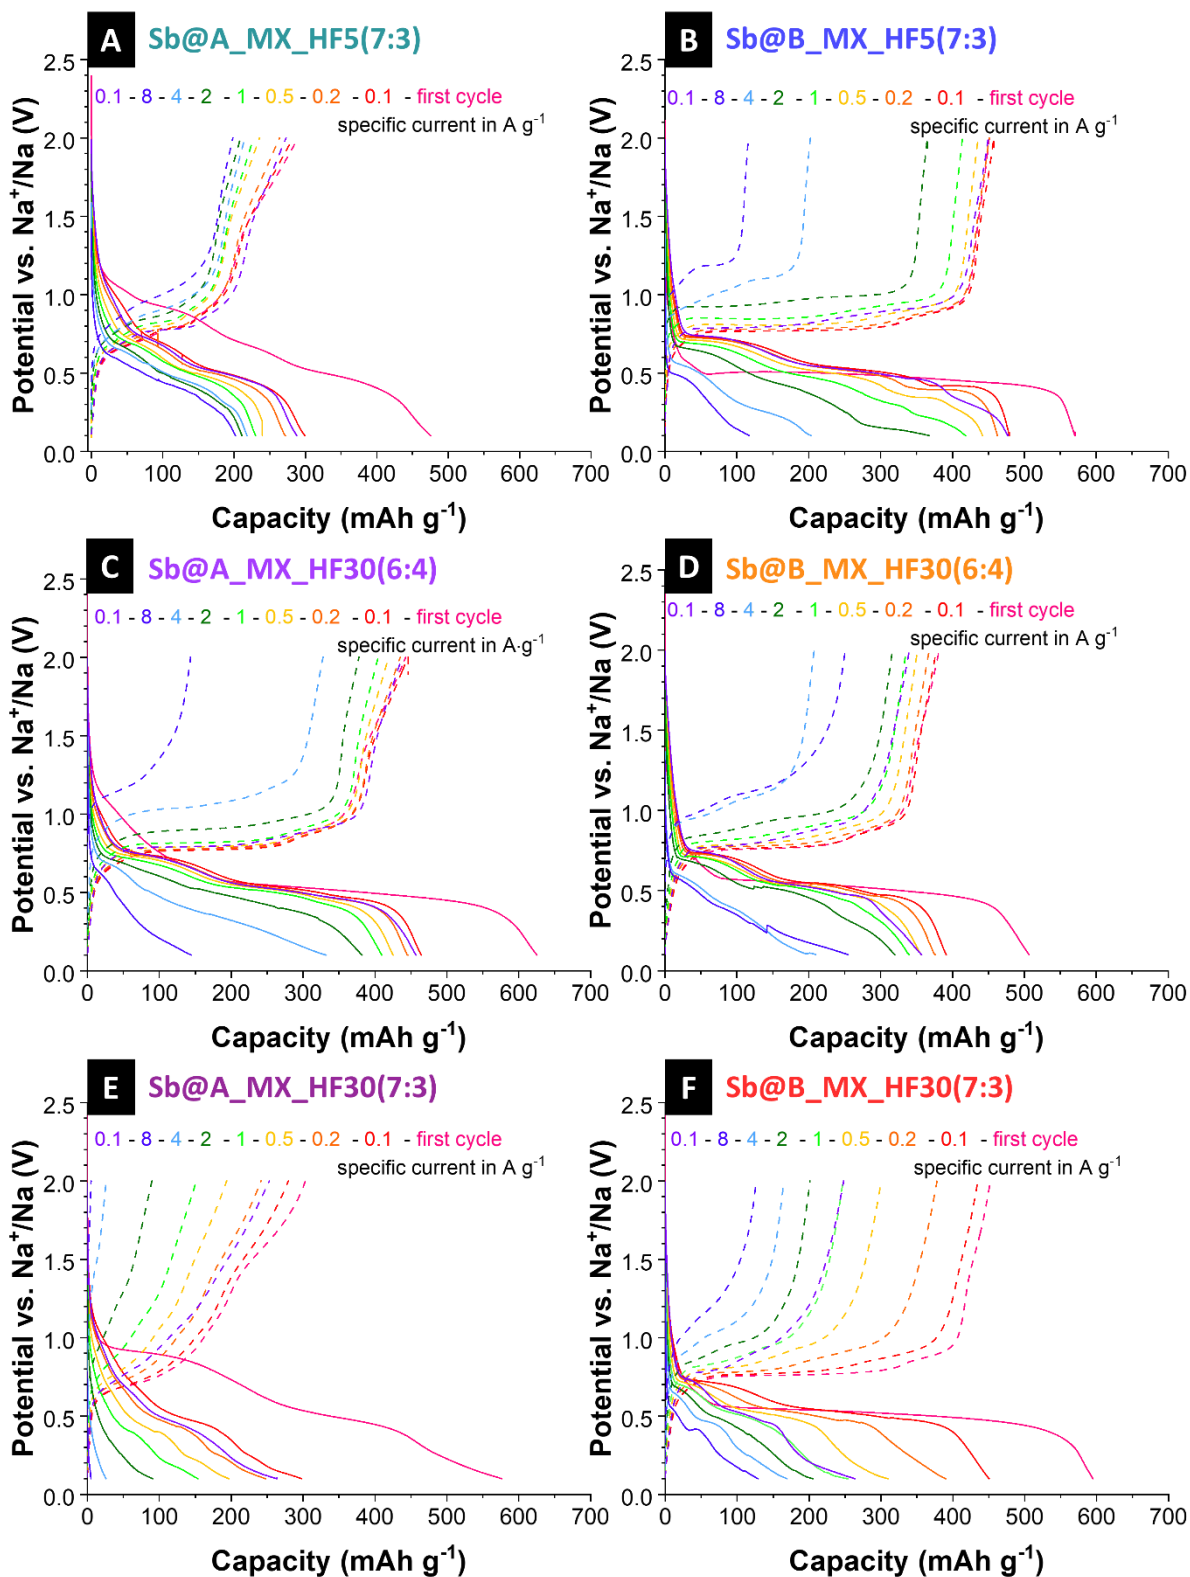

**Figure S9:** Galvanostatic charge and discharge profiles at different applied specific currents of 0.1-8 A g<sup>-1</sup> between 1.0 V and 3.0 V vs. Na<sup>+</sup>/Na of (A) Sb@A\_MX\_HF5(7:3), (B) Sb@B\_MX\_HF5(7:3), (C) Sb@A\_MX\_HF30(6:4), (D) Sb@B\_MX\_HF30(6:4), (E) Sb@A\_MX\_HF30(7:3), and (F) Sb@B\_MX\_HF30(7:3).

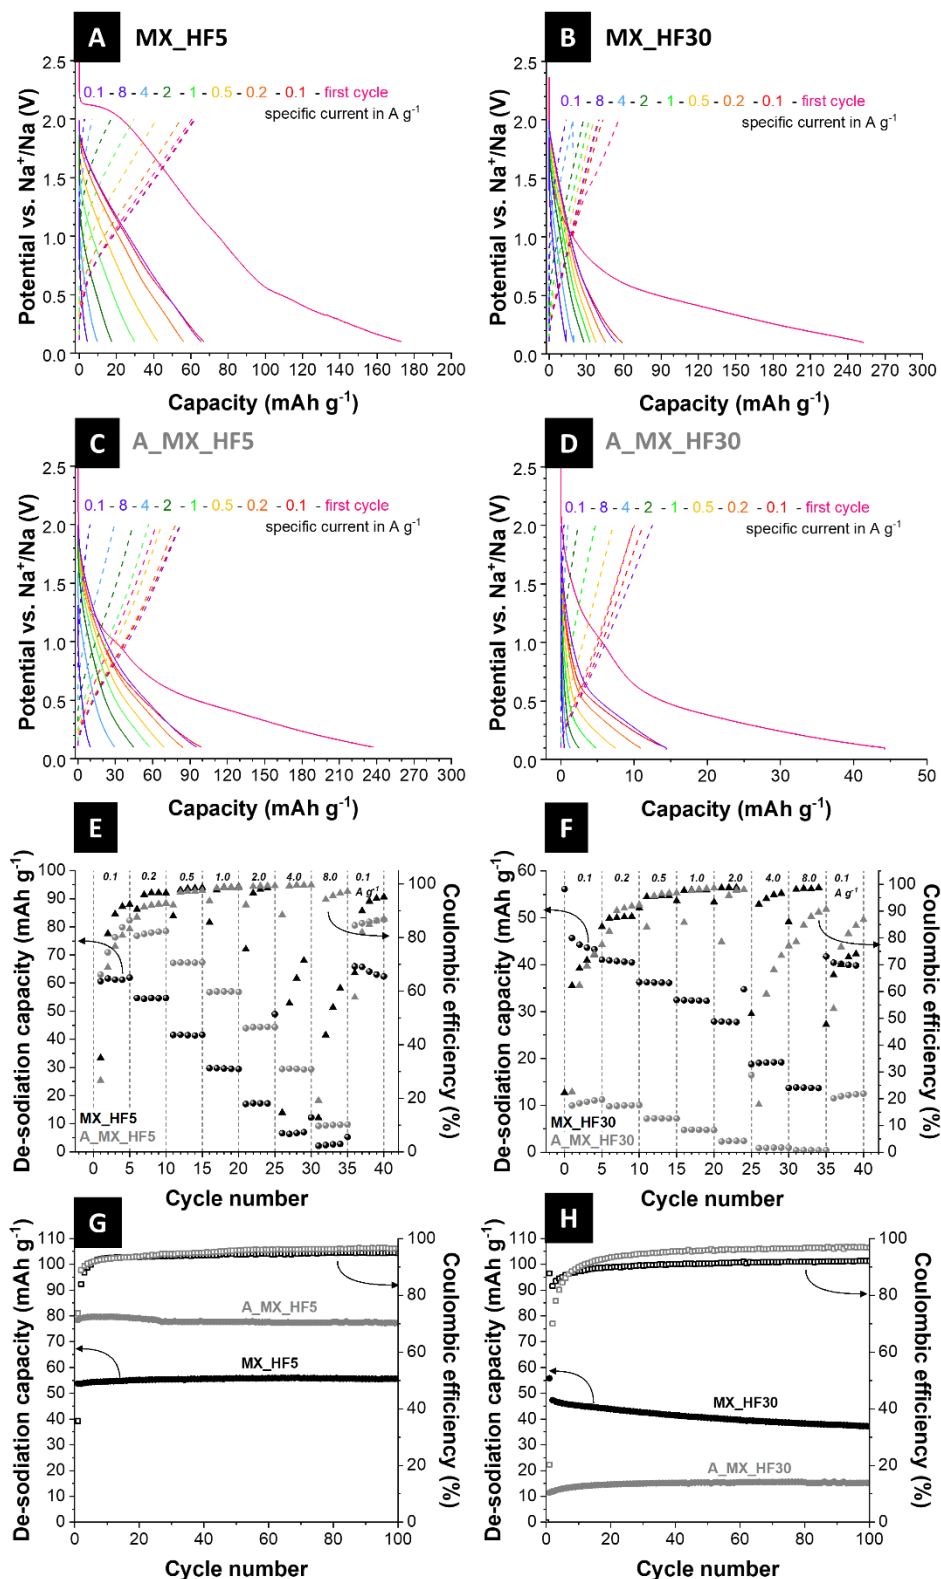

**Figure S10:** Electrochemical characterization of the non-expanded and expanded  $\text{Ti}_3\text{C}_2\text{T}_x$ , etched with 5 mass% HF. Galvanostatic charge and discharge profiles at rates of 0.1-8  $\text{A g}^{-1}$  (1.0-3.0 V vs.  $\text{Na}^+/\text{Na}$ ) of (A) MX\_HF5, (B) MX\_HF30, (C) A\_MX\_HF5, and (D) A\_MX\_HF30. Rate performance using galvanostatic charge/discharge cycling and Coulombic efficiency values at different rates for (E) MX\_HF5 and A\_MX\_HF5, (F) MX\_HF30 and A\_MX\_HF30. Galvanostatic charge/discharge cycling stability and Coulombic efficiency values at a specific current of 0.1  $\text{A g}^{-1}$  for (G) MX\_HF5 and A\_MX\_HF5, (H) MX\_HF30 and A\_MX\_HF30.

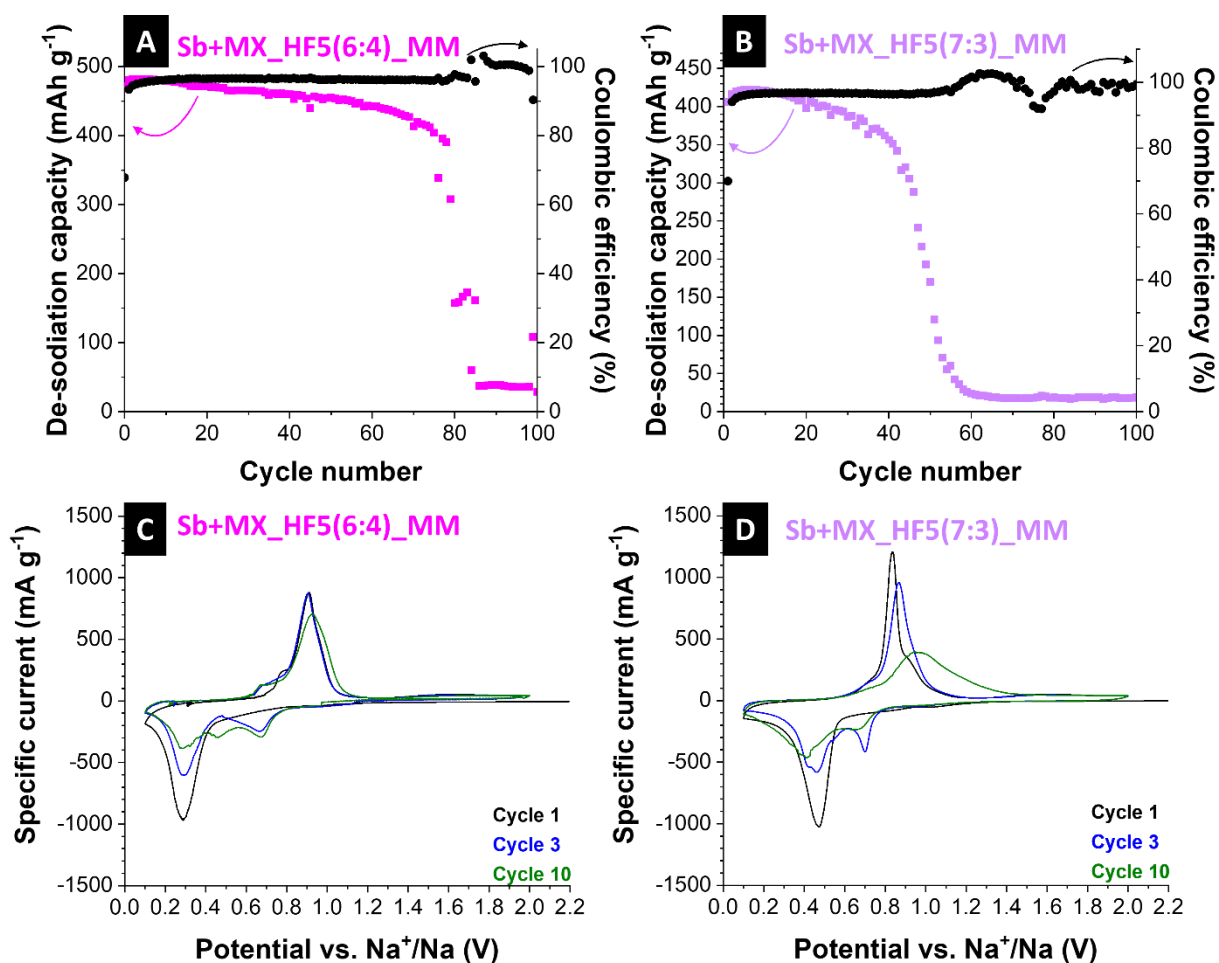

**Figure S11:** Galvanostatic charge/discharge cycling performance electrochemical stability with corresponding Coulombic efficiency values at a specific current of  $0.1 \text{ A g}^{-1}$  for (A) Sb+MX\_HF5(6:4)\_MM, and (B) Sb+MX\_HF5(7:3)\_MM. Cyclic voltammograms recorded at a rate of  $0.1 \text{ mV s}^{-1}$  in the potential range of 0.1-2.0 V vs. Na<sup>+</sup>/Na for (C) Sb+MX\_HF5(6:4)\_MM, and (D) Sb+MX\_HF5(7:3)\_MM.

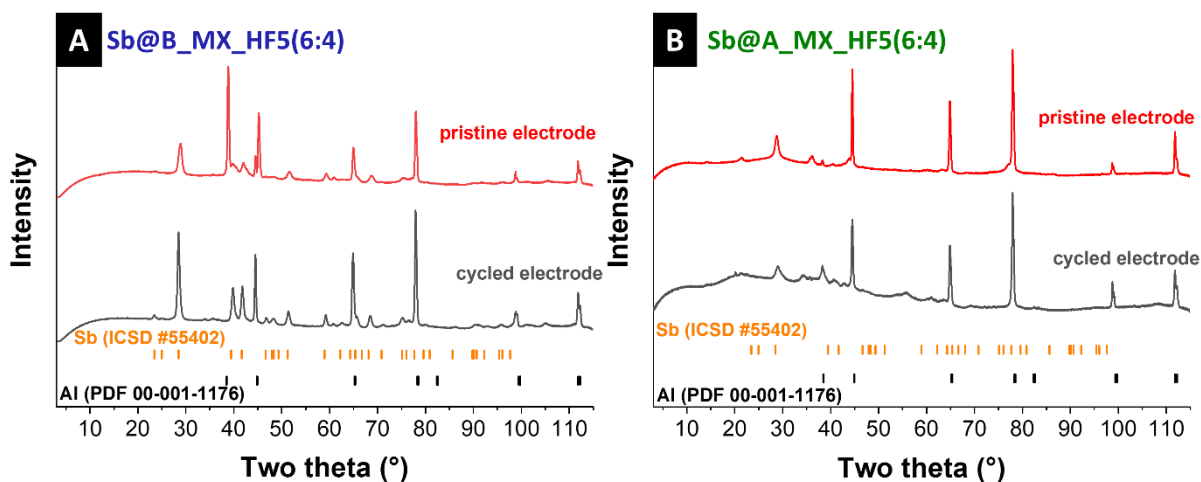

**Figure S12:** X-ray diffraction pattern of (A) pristine and post mortem Sb@B\_MX\_HF5(6:4) electrode (B) pristine and cycled Sb@A\_MX\_HF5(6:4) electrode. The diffraction patterns were recorded with the setup XRD-2 (see Experimental).

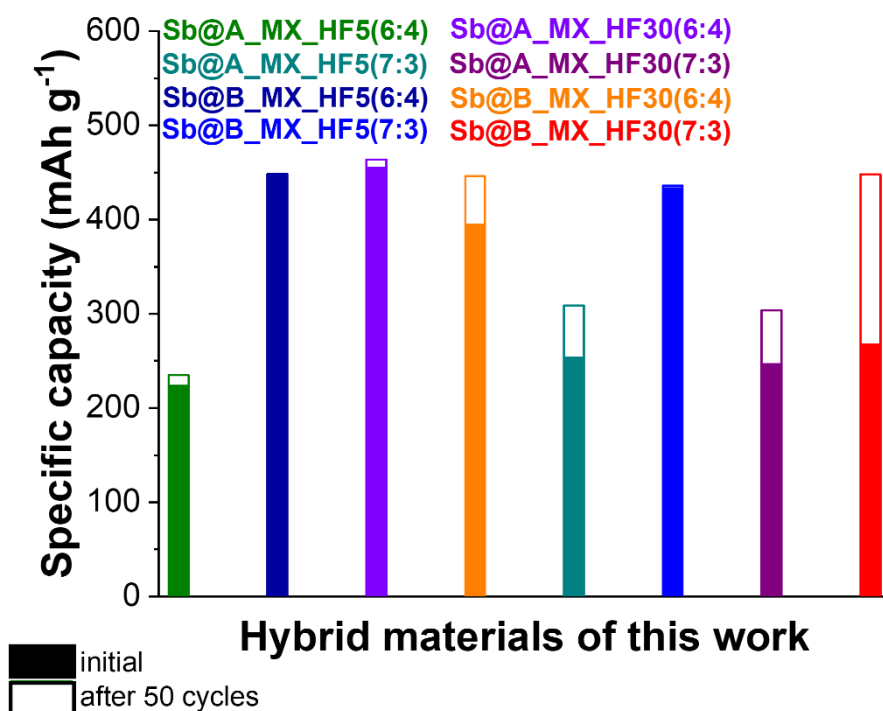

**Figure S13:** Graphical illustration and overview of initial specific capacities as well as values after 50 cycles of cycling at a specific current of 0.1 A g<sup>-1</sup> of all hybrid antimony MXene hybrid materials produced in this work.
